# Supplementary material
Source: publisher figshare collection journal article supplement (https://sage.figshare.com/ndownloader/files/23134097)
Supplement: Supplementary file 1 [file 23134097]

**Supplementary Table 1:** Excluded studies. A table showing the exclusion grounds for articles excluded after full-text assessment.

| Article                                                                                                                                                                                               | Reason for Rejection                            |
|-------------------------------------------------------------------------------------------------------------------------------------------------------------------------------------------------------|-------------------------------------------------|
| Anthony 2006<br>Transmetatarsal amputation: assessment of current selection criteria.                                                                                                                 | Diabetes participants not evaluated separately. |
| Boeckstyns 1984<br>Amputation of the forefoot. Predictive value of signs and clinical physiological tests.                                                                                            | Diabetes participants not evaluated separately. |
| Nehler 1999<br>Intermediate-term outcome of primary digit amputations in patients with diabetes mellitus who have forefoot sepsis requiring hospitalization and presumed adequate circulatory status. | Toe pressure data combined with other data.     |
| Pollard 2006<br>Mortality and morbidity after trans metatarsal amputation: retrospective review of 101 cases.                                                                                         | Diabetes participants not evaluated separately. |
| Schwartz 1982<br>Predictive value of distal perfusion pressure in the healing of amputation of the digits and the forefoot.                                                                           | Diabetes participants not evaluated separately. |
| Stone 2018<br>Toe Pressures are Superior to Duplex Parameters in Predicting Wound Healing following Toe and Foot Amputations.                                                                         | Diabetes participants not evaluated separately. |
| Ramsey 1983<br>Toe blood pressure. A valuable adjunct to ankle pressure measurement for assessing peripheral arterial disease                                                                         | Amputation data not reported separately.        |
